# Supplementary material for: Mo polyoxometalate nanoclusters capable of inhibiting the aggregation of Aβ-peptide associated with Alzheimer's disease
Source: Royal Society of Chemistry journal article supplement (doi:10.1039/c3nr05906e), 2014-01-01
Supplement: c3nr05906e1.pdf [file c3nr05906e1.pdf]

## SUPPORTING INFORMATION

### **Mo polyoxometalate nanoclusters capable of inhibiting the aggregation of A $\beta$ -peptide associated with Alzheimer's disease**

**Qingchang Chen <sup>a,1</sup>, Licong Yang <sup>a,1</sup>, Chuping Zheng <sup>a</sup>, Wenjing Zheng <sup>a</sup> Jingnan Zhang <sup>a</sup>, Yunshan Zhou <sup>b</sup>, Jie Liu <sup>a,\*</sup>**

<sup>a</sup> Department of Chemistry, Jinan University, Guangzhou 510632, P. R. China;

<sup>b</sup> State Key Laboratory of Chemical Resource Engineering Institute of Science, Beijing University of Chemical Technology, Beijing 100029 (P.R. China)

<sup>1</sup>: Both authors contribute equally to this work.

\*Corresponding author. Tel: +86-20-8522-0223; Fax: + 86-20-8522-0223. E-mail: tliuliu@jnu.edu.cn(Jie Liu);

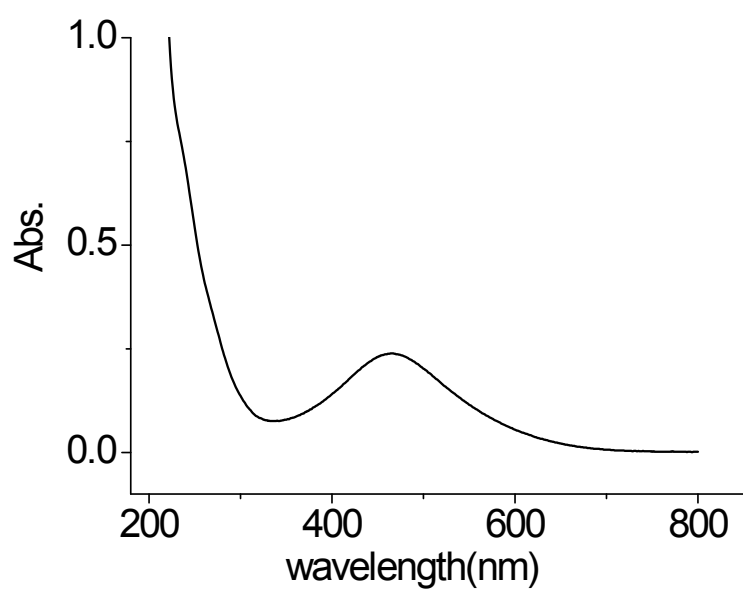

Fig. S1. UV-vis spectrum of complex **3** in water at a concentration of  $1.2 \times 10^{-6}M$

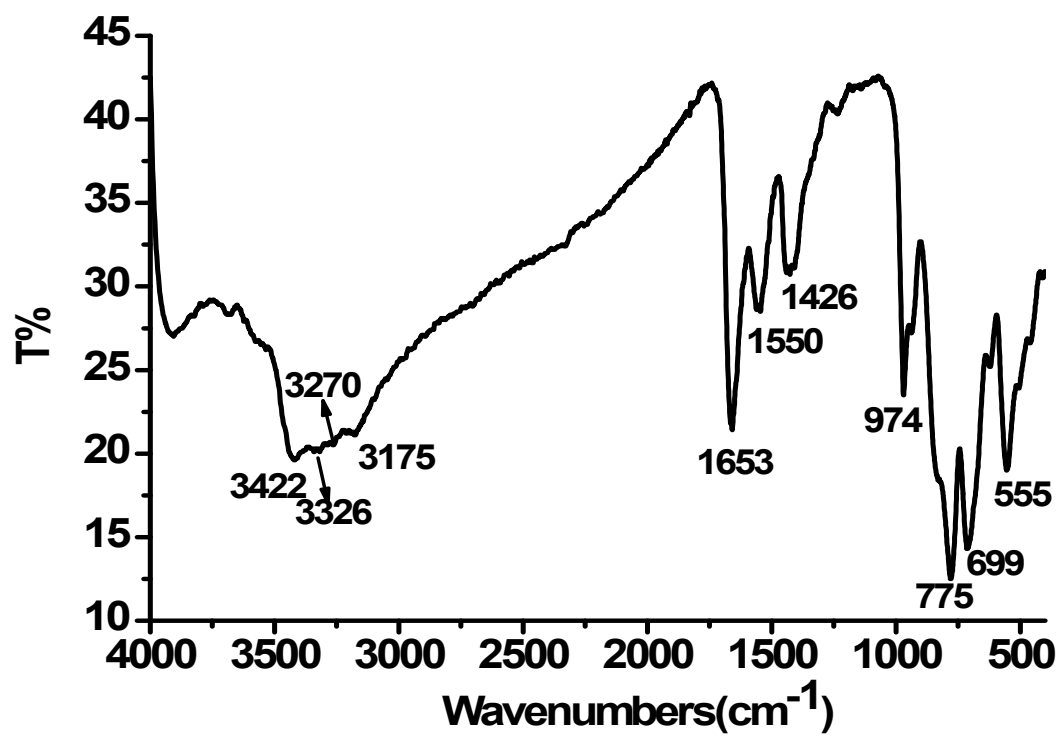

Fig. S2. IR-spectrum of complex 3

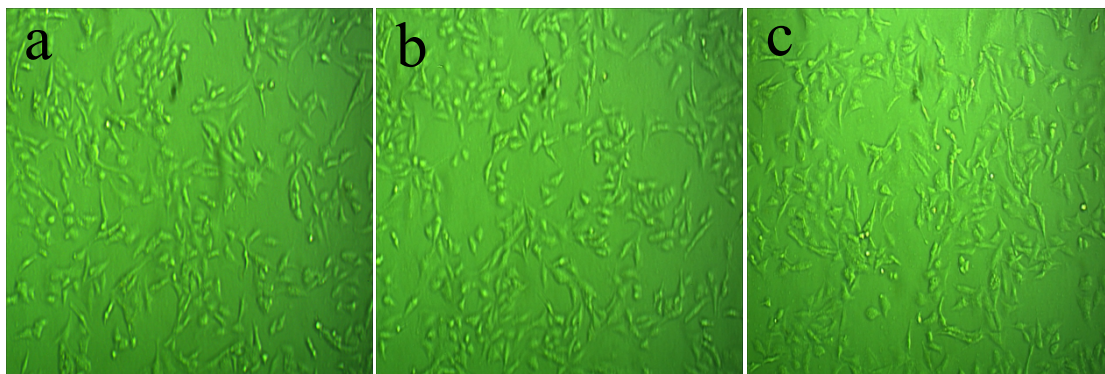

Fig .S3 The changes of PC12 morphology at Zn<sup>2+</sup> treatment under light microscopy for different concentrations after 48 h. (a) 40 μM, (b)80 μM, (c)160 μM
